# Supplementary material
Source: PubMed Central journal article supplement (PMC7855833)

**A.**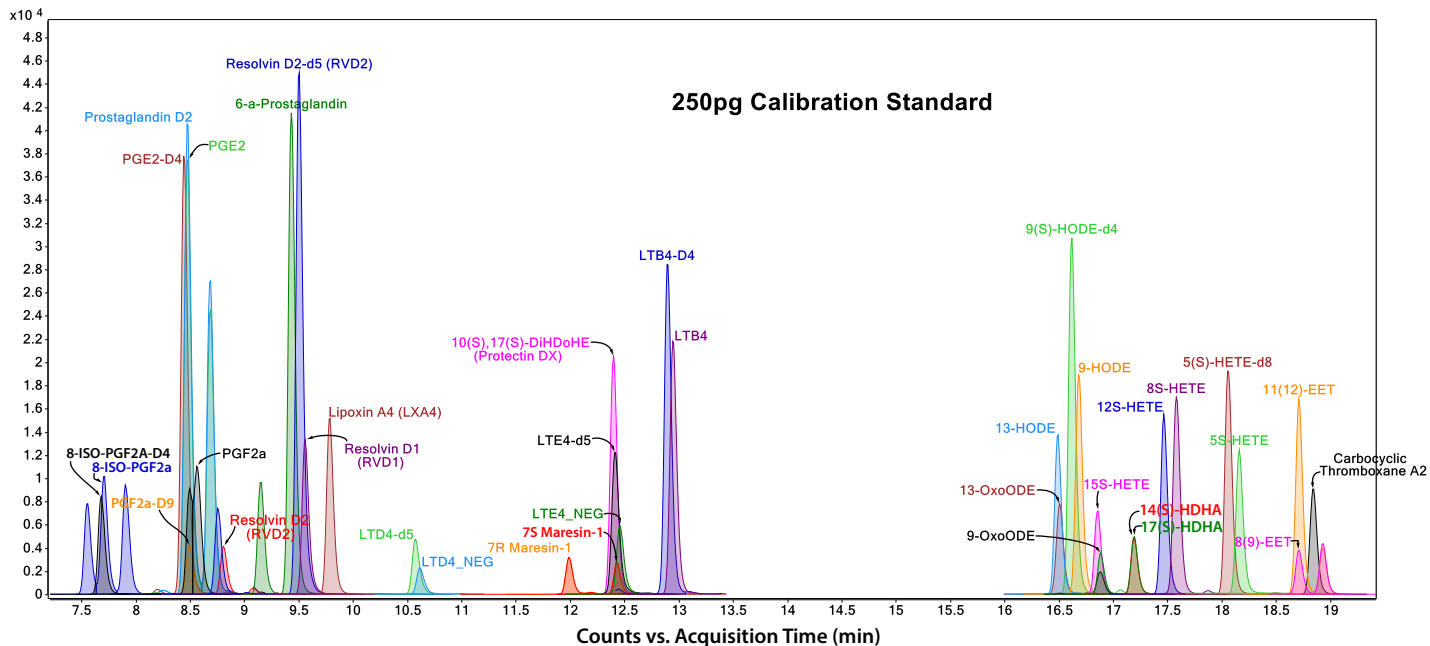**B.**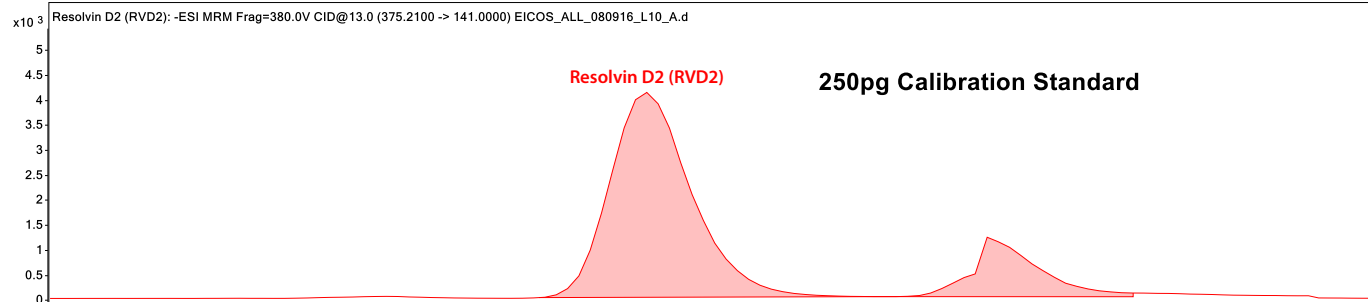**C.**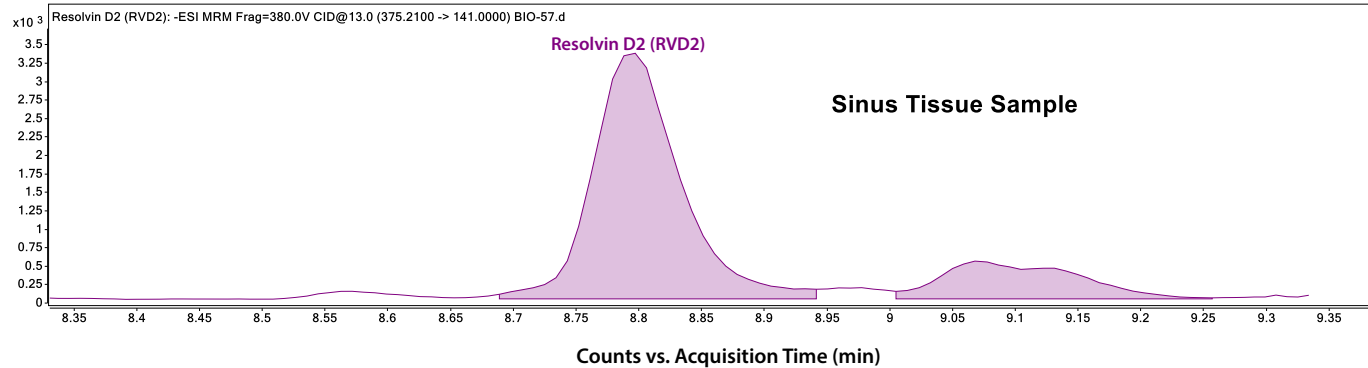

Supplement: NIHMS1654872-supplement-1.pdf [file NIHMS1654872-supplement-1.pdf]
